# Supplementary material for: WNT/β-catenin signaling mediates human neural crest induction via a pre-neural border intermediate
Source: Oxford University Press journal article supplement (doi:10.1242/dev.130849), 2016-02-01
Supplement: dev130849supp.pdf [file dev130849supp.pdf]

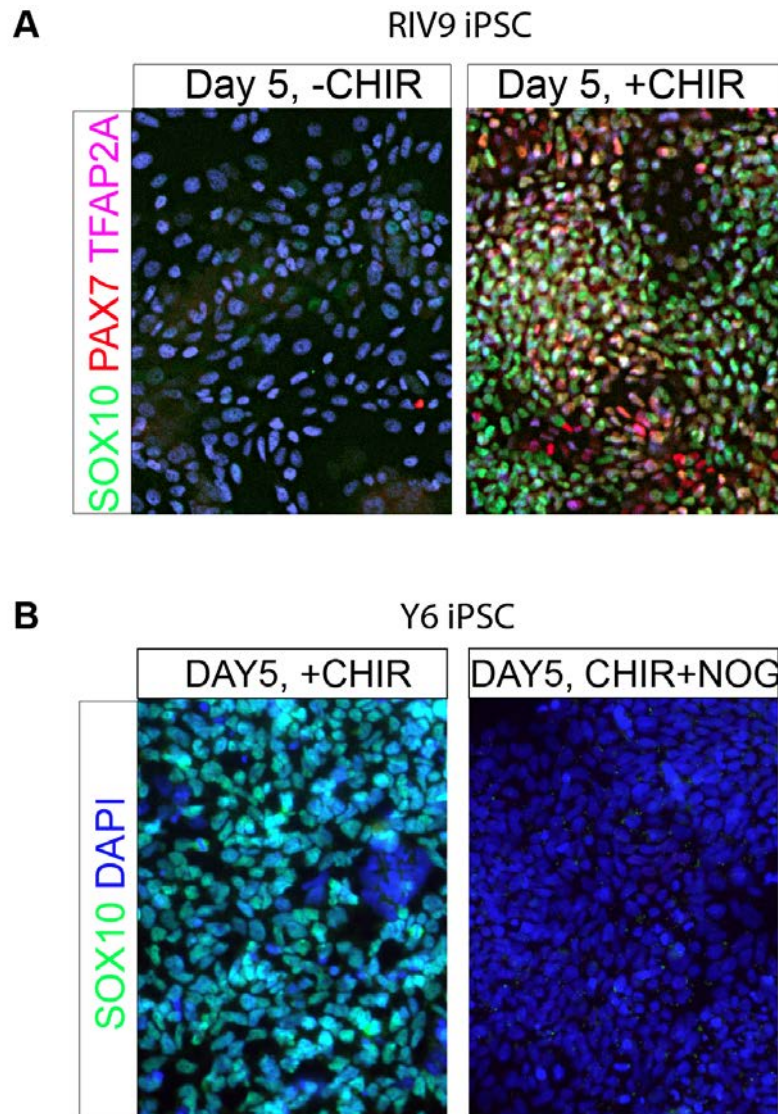

**Supplementary figure 1. CHIR 99021 induces neural crest cells in human Y6 iPSCs.** SOX10 (green), PAX7 (red) and TFAP2 (violet) triple immunostaining of iPSC RIV9 cultured after dissociation under control (No CHIR) or with CHIR for 5 days. SOX10 staining of day 5 Y6 iPSC cultures treated continuously with 3  $\mu$ M CHIR and with or without 300 ng/mL NOGGIN from day 0 to day 1.

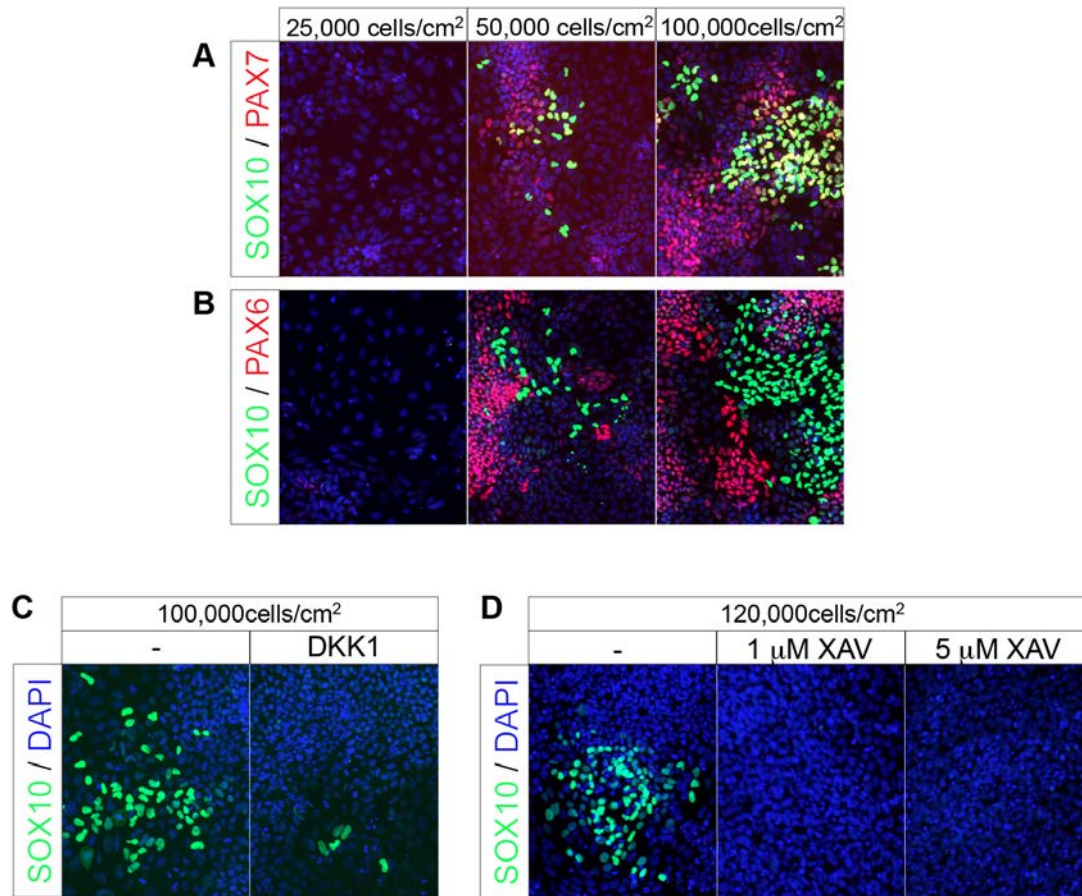

**Supplementary figure 2. Spontaneous induction of SOX10<sup>+</sup>, PAX7<sup>+</sup> and PAX6<sup>+</sup> cells in high-density cultures.** A, B. Dissociated hESCs were plated at the indicated densities and cultured for 5 days in the base medium for NC induction without the administration of CHIR. SOX10/PAX7 (A) and SOX10/PAX6 (B) double labeling were performed. C. Day 5 cultures at the indicated initial seeding density were treated with or without 100 ng/mL DKK1 for 5 days and were stained with SOX10 antibody. D. Differentiating hESCs cultured in base differentiation medium without CHIR were treated with or without XAV 939 (XAV) at the indicated concentrations. Day 5 cultures were collected for SOX10 immunofluorescence.

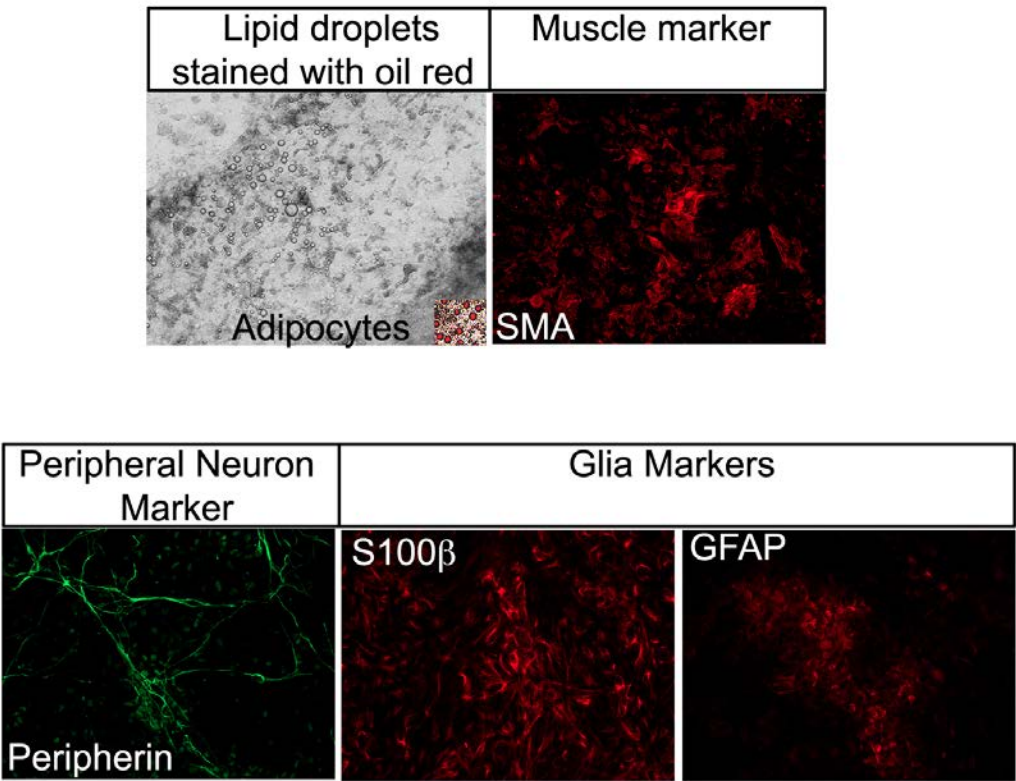

**Supplementary figure 3. Terminal neural crest derivatives derived from WNT3a induced neural crest cells.** Dissociated hESCs were induced for 5 days in Wnt3a (10 ng/ml) prior to being assayed for their ability to produce neural crest derivatives. Assays were specific to the derivatives of interest.

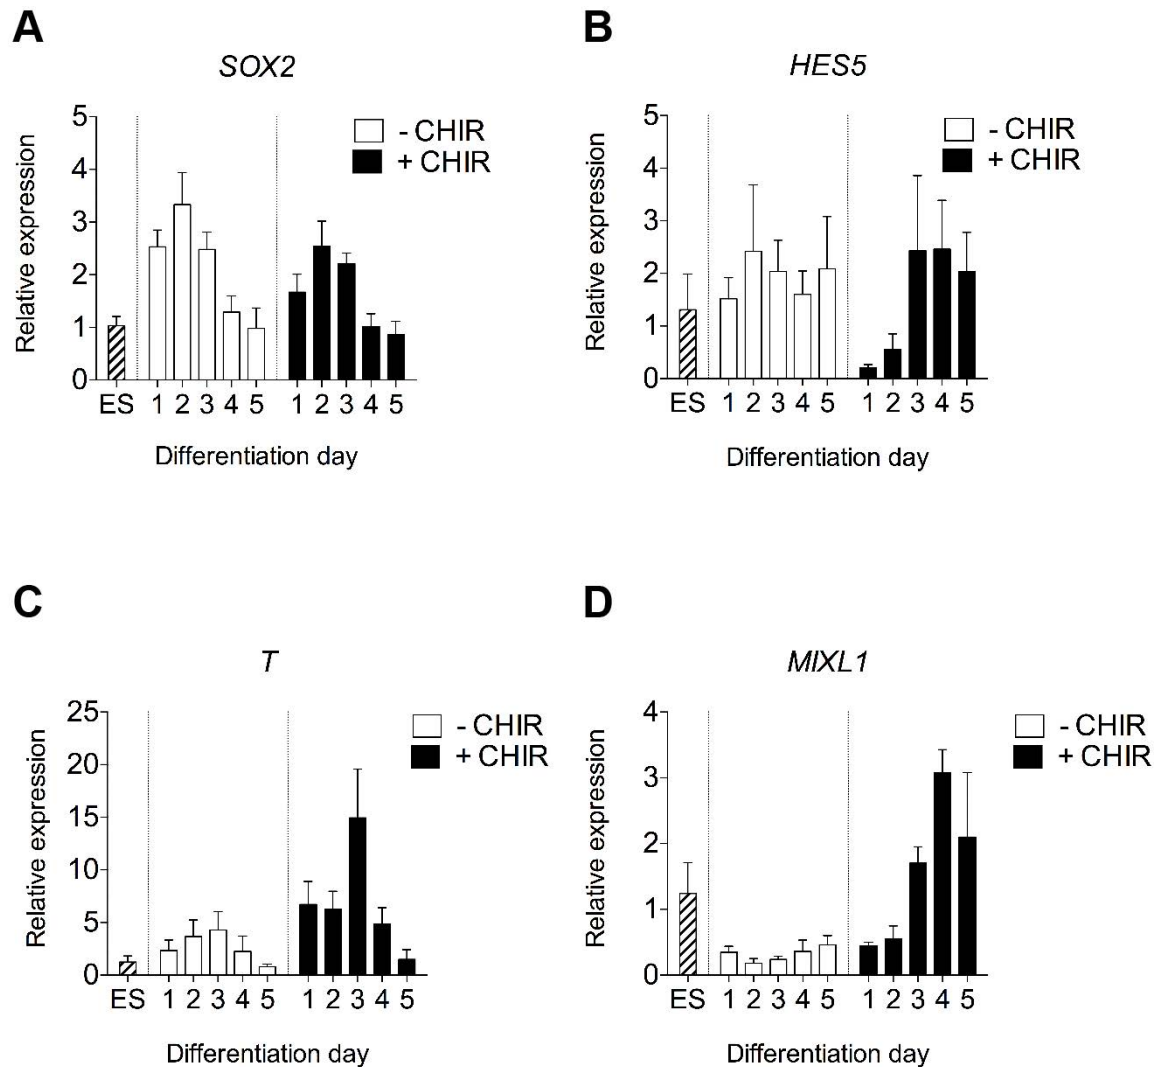

**Supplementary figure 4. Expression of neural and mesoderm associated transcripts during human NC induction.** A-D. Time course real time PCR assays of *SOX2*, *HES5*, *T* and *MIXL1* during human NC induction.

Supplementary table 1. Human primer sequences for real-time PCR of gene markers during ESC differentiation.

| Transcript             | Forward                | Reverse               |
|------------------------|------------------------|-----------------------|
| <i>ACTB</i>            | TGAACCCCAAGGCCAACCGC   | GACCCCGTCACCGGAGTCCA  |
| <i>AXIN2</i>           | AGTCAGCAGAGGGACAGGAA   | AGCTCTGAGCCTTCAGCATC  |
| <i>CHD1/E-CADHERIN</i> | GGATGTGCTGGATGTGAATG   | CTCAAATCCTCCCTGTCCA   |
| <i>CTNNB1</i>          | TCCCACTGGCCTCTGATAAA   | AAC TAGTCGTGGAATGGCAC |
| <i>ΔNp63</i>           | GGAAAACAATGCCCAGACTC   | GTGGAATACGTCCAGGTGGC  |
| <i>DLX5</i>            | ACGCTAGCTCCTACCACCAG   | TTTGCCATTACCATTTCTCA  |
| <i>FOXD3</i>           | GCATCTGCGAGTTCATCAGC   | CGTTGAGTGAGAGGTTGTGG  |
| <i>GATA3</i>           | GAGGAGGTGGATGTGCTTTT   | CAGGGTAGGGATCCATGAAG  |
| <i>HES5</i>            | CTCAGCCCCAAAGAGAAAAA   | TAGTCCTGGTGCAGGCTCTT  |
| <i>MIXL1</i>           | AGCTGCTGGAGCTCGTCTTC   | TGGAAGGATTTCCCACTCTG  |
| <i>MSX1</i>            | CTGCACCCTCCGCAAACACA   | AGGCTGAGCGAGCTGGAGAA  |
| <i>MSX2</i>            | CGGTCAAGTCGGAAAATTCA   | GAGGAGCTGGGATGTGGTAA  |
| <i>NANOG</i>           | CAAAGGCAAACAACCCACTT   | TCTGCTGGAGGCTGAGGTAT  |
| <i>NR2F1</i>           | CGAGTACAGCTGCCTCAAAG   | TACTGGCTCCTCACGTACTC  |
| <i>OCT4</i>            | GAAGGATGTGGTCCGAGTGT   | GTGAAGTGAGGGCTCCATA   |
| <i>PAX3</i>            | AATTACTCAAGGACGCGGTC   | TTCTTCTCGCTTTCCTCTGC  |
| <i>PAX6</i>            | CACCTACAGCGCTCTGCCGC   | CCCGAGGTGCCATTGGCTG   |
| <i>PAX7</i>            | TGACAGCTTCATGAATCCGG   | GATGGAGAAGTCAGCCTGTG  |
| <i>SIX1</i>            | TCAGCTCCAAGACTCTCTGC   | ACAAGCTGCAAAAATGTTCC  |
| <i>SNAI2</i>           | CAGACCCTGGTTGCTTCAAG   | GAGCCCTCAGATTTGACCTG  |
| <i>SOX2</i>            | TCAAGCGGCCCATGAATGCC   | AGCCGCTTAGCCTCGTCGAT  |
| <i>SOX10</i>           | CTCTGGAGGCTGCTGAA      | TGGGCTGGTACTTGTAGTC   |
| <i>T</i>               | AGGCTCCCGTCTCCTTCAGCAA | TGGCTGGTGATCATGCGCTGT |
| <i>TFAP2A</i>          | GATCCTCGCAGGGACTACAG   | TACCCGGGTCTTCTACATGC  |
| <i>ZIC1</i>            | GTCCTACACGCATCCCAGTT   | GCGATAAGGAGCTTGTGGTC  |
| <i>ZIC3</i>            | AAGTCTTTCAAGGCGAAGTA   | GTCACAGCCTTCAAATTCAC  |

Supplementary table 2. Short-hairpin RNA sequences and information for knockdown experiments in hESCs.

| Transcripts          | ID            | RNA consortium<br>Clone ID | Target sequence              | Match<br>region | Knockdown<br>efficiency* |
|----------------------|---------------|----------------------------|------------------------------|-----------------|--------------------------|
| <i>CTNNB1</i>        | shRNA1        | TRCN0000003844             | CGCATGGAAGAAATAGTTGAA        | CDS             | 62%                      |
| <b><i>CTNNB1</i></b> | <b>shRNA2</b> | <b>TRCN0000314921</b>      | <b>TCTAACCTCACTTGCAATAAT</b> | <b>CDS</b>      | <b>82%</b>               |
| <i>CTNNB1</i>        | shRNA3        | TRCN0000010824             | CCATTGTTTGTGCAGCTGCTT        | CDS             | 46%                      |
| <i>PAX6</i>          | shRNA1        | TRCN0000016123             | GCAAGAATACAGGTATGGTTT        | CDS             | 74%                      |
| <i>PAX6</i>          | shRNA2        | TRCN0000016125             | CGTCCATCTTTGCTTGGGAAA        | CDS             | 68%                      |
| <b><i>PAX6</i></b>   | <b>shRNA3</b> | <b>TRCN0000246162</b>      | <b>ATACGCACTGTTGGTACAATT</b> | <b>3UTR</b>     | <b>97%</b>               |

\*Knockdown efficiency was measured by real-time PCR in undifferentiated hESCs and differentiated ESC cultures at day 5 for *CTNNB1* and *PAX6* respectively. The species with the highest knockdown were bolded and selected for functional analyses.



Supplementary table 3. Antibodies used for immunofluorescence.

| Protein/Gene  | Source                       | Catalog no.  | Antibody type | Dilution |
|---------------|------------------------------|--------------|---------------|----------|
| PAX7          | Developmental hybridoma bank | Pax7         | Mouse IgG1    | 1:50     |
| PAX6          | Developmental hybridoma bank | Pax6         | Mouse IgG1    | 1:100    |
| TFAP2A        | Developmental hybridoma bank | 3B5          | Mouse IgG2b   | 1:50     |
| ISL1          | Developmental hybridoma bank | Isl1/2       | Mouse IgG2b   | 1:100    |
| SOX10         | Vivian Lee                   | -            | Rabbit        | 1:3000   |
| POU5F1 (OCT4) | Santa Cruz Biotechnology     | SC-5279      | Mouse IgG2b   | 1:250    |
| T (BRACHYURY) | R&D Systems                  | AF2085       | Goat          | 1:200    |
| HuC/D         | Molecular probe              | A-21271      | Mouse IgG2b   | 1:300    |
| S100 $\beta$  | Thermo-Scientific            | MA1-2505     | Mouse IgG1    | 1:100    |
| MITF          | R&D Systems                  | AF5769       | Goat          | 1:50     |
| PRPH          | Millipore                    | AB1530       | Rabbit        | 1:200    |
| TUJ1          | Covance                      | MMS-435P-250 | Mouse IgG2a   | 1:2000   |
| GFAP          | Covance                      | SMI-22R      | mouse IgG2b   | 1:500    |
